# Supplementary material for: Iridium–aluminium trichloride co-catalysed hydroformylation–acetalization of olefins with H2O as the hydrogen source
Source: Royal Society of Chemistry journal article supplement (doi:10.1039/d2re00469k), 2022-12-30
Supplement: d2re00469k1.pdf [file d2re00469k1.pdf]

## Supplementary Information

### Selected screening data

**S. Table 1** Ir-catalyzed tandem hydroformylation–acetalization of 1-hexene with different ligands.<sup>[a]</sup>

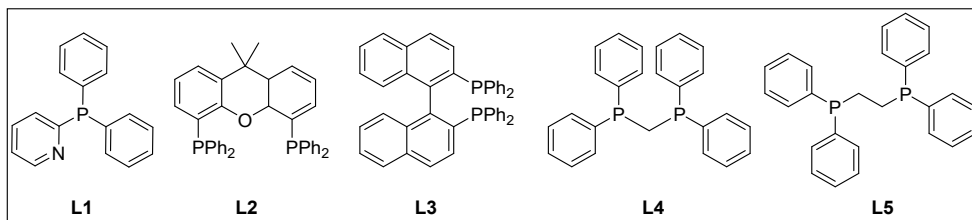

| Entry | Ligand                 | Conv. (%) <sup>[b]</sup> | S <sub>oxo</sub> (%) <sup>[b, c]</sup> | P <sub>acetals</sub> (%) <sup>[b, c]</sup> | S <sub>iso</sub> (%) <sup>[b, c]</sup> | S <sub>hexane</sub> (%) <sup>[b, c]</sup> | L/B <sup>[b]</sup> |
|-------|------------------------|--------------------------|----------------------------------------|--------------------------------------------|----------------------------------------|-------------------------------------------|--------------------|
| 1     | <b>PPh<sub>3</sub></b> | 100                      | 87                                     | 88                                         | 10                                     | 3                                         | 2.6                |
| 2     | <b>L1</b>              | 100                      | 48                                     | 52                                         | 40                                     | 12                                        | 2.2                |
| 3     | <b>L2</b>              | 100                      | 48                                     | 54                                         | 41                                     | 11                                        | 2.0                |
| 4     | <b>L3</b>              | 100                      | 43                                     | 63                                         | 50                                     | 7                                         | 3.3                |
| 5     | <b>L4</b>              | 100                      | 31                                     | 61                                         | 64                                     | 5                                         | 2.7                |
| 6     | <b>L5</b>              | 100                      | 78                                     | 55                                         | 11                                     | 11                                        | 3.6                |
| 7     | /                      | 97                       | 19                                     | 74                                         | 78                                     | 3                                         | 5.1                |

[a] 1-hexene 2.0 mmol, [Ir(COD)Cl]<sub>2</sub> 0.01 mmol (Ir 1 mol %), Ligand 0.02 mmol (P/Ir = 1 molar ratio), AlCl<sub>3</sub> 0.02 mmol (1 mol %), H<sub>2</sub>O 0.2 g, methanol 70 mmol, *N*-methyl pyrrolidone (NMP) 1.5 mL, CO 4.0 MPa, React at 140 °C for 22 hours, then at 100 °C for 3 hours. [b] Determined by GC and GC-MS. [c] S<sub>oxo</sub> = (aldehydes + acetals) / (aldehydes + acetals + iso-hexenes + hexane), P<sub>acetals</sub> = acetals / (aldehydes + acetals), percentage of acetals in the total oxo-products, S<sub>iso</sub> = iso-hexenes / (aldehydes + acetals + iso-hexenes + hexane), S<sub>hexane</sub> = hexane / (aldehydes + acetals + iso-hexenes + hexane), L/B, the ratio of linear acetals to branched acetals.
